# Supplementary material for: Transport properties of the Ba(Zr,Ce,Y,Yb)O3−δ proton conductor: the real role of co-substitution of Y and Yb
Source: Royal Society of Chemistry journal article supplement (doi:10.1039/d3ta07486b), 2024-01-01
Supplement: d3ta07486b1.pdf [file d3ta07486b1.pdf]

## Supporting Information

# Transport Properties of Ba(Zr,Ce,Y,Yb)O<sub>3-δ</sub> Proton Conductor: the Real Role of Co-Substitution of Y and Yb

Hui Guo <sup>1,+</sup>, Yifeng Li <sup>1,+</sup>, Lulu Jiang <sup>1</sup>, Yenan Sha <sup>1</sup>, Shihang Guo <sup>1</sup>, Donglin Han <sup>1,2,3,4\*</sup>

<sup>1</sup> College of Energy, Soochow University, No 1 Shizi Street, Gusu District, Suzhou 215006, China

<sup>2</sup> Provincial Key Laboratory for Advanced Carbon Materials and Wearable Energy Technologies, Soochow University, No 1 Shizi Street, Gusu District, Suzhou 215006, China

<sup>3</sup> Jiangsu Key Laboratory of Advanced Negative Carbon Technologies, Soochow University, Suzhou 215123, China

<sup>4</sup> Light Industry Institute of Electrochemical Power Sources, Shahu Science & Technology Innovation Park, Suzhou 215638, China

<sup>+</sup> These authors contributed equally.

<sup>\*</sup> Corresponding author: Donglin Han (dlhan@suda.edu.cn)

## 1. XRD Patterns

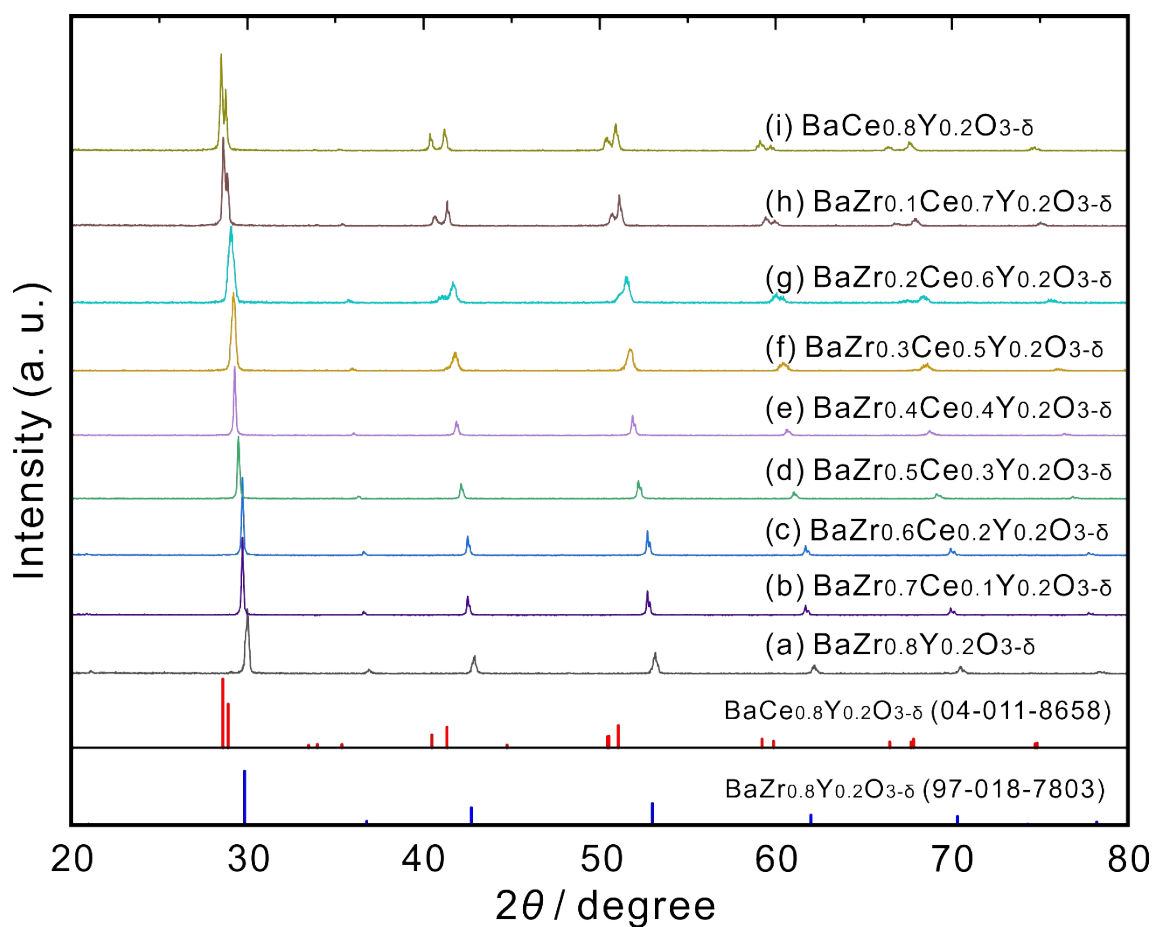

**Figure S1** Powder XRD patterns of (a) BaZr<sub>0.8</sub>Y<sub>0.2</sub>O<sub>3-δ</sub>, (b) BaZr<sub>0.7</sub>Ce<sub>0.1</sub>Y<sub>0.2</sub>O<sub>3-δ</sub>, (c) BaZr<sub>0.6</sub>Ce<sub>0.2</sub>Y<sub>0.2</sub>O<sub>3-δ</sub>, (d) BaZr<sub>0.5</sub>Ce<sub>0.3</sub>Y<sub>0.2</sub>O<sub>3-δ</sub>, (e) BaZr<sub>0.4</sub>Ce<sub>0.4</sub>Y<sub>0.2</sub>O<sub>3-δ</sub>, (f) BaZr<sub>0.3</sub>Ce<sub>0.5</sub>Y<sub>0.2</sub>O<sub>3-δ</sub>, (g) BaZr<sub>0.2</sub>Ce<sub>0.6</sub>Y<sub>0.2</sub>O<sub>3-δ</sub>, (h) BaZr<sub>0.1</sub>Ce<sub>0.7</sub>Y<sub>0.2</sub>O<sub>3-δ</sub> and (i) BaCe<sub>0.8</sub>Y<sub>0.2</sub>O<sub>3-δ</sub> after sintering.

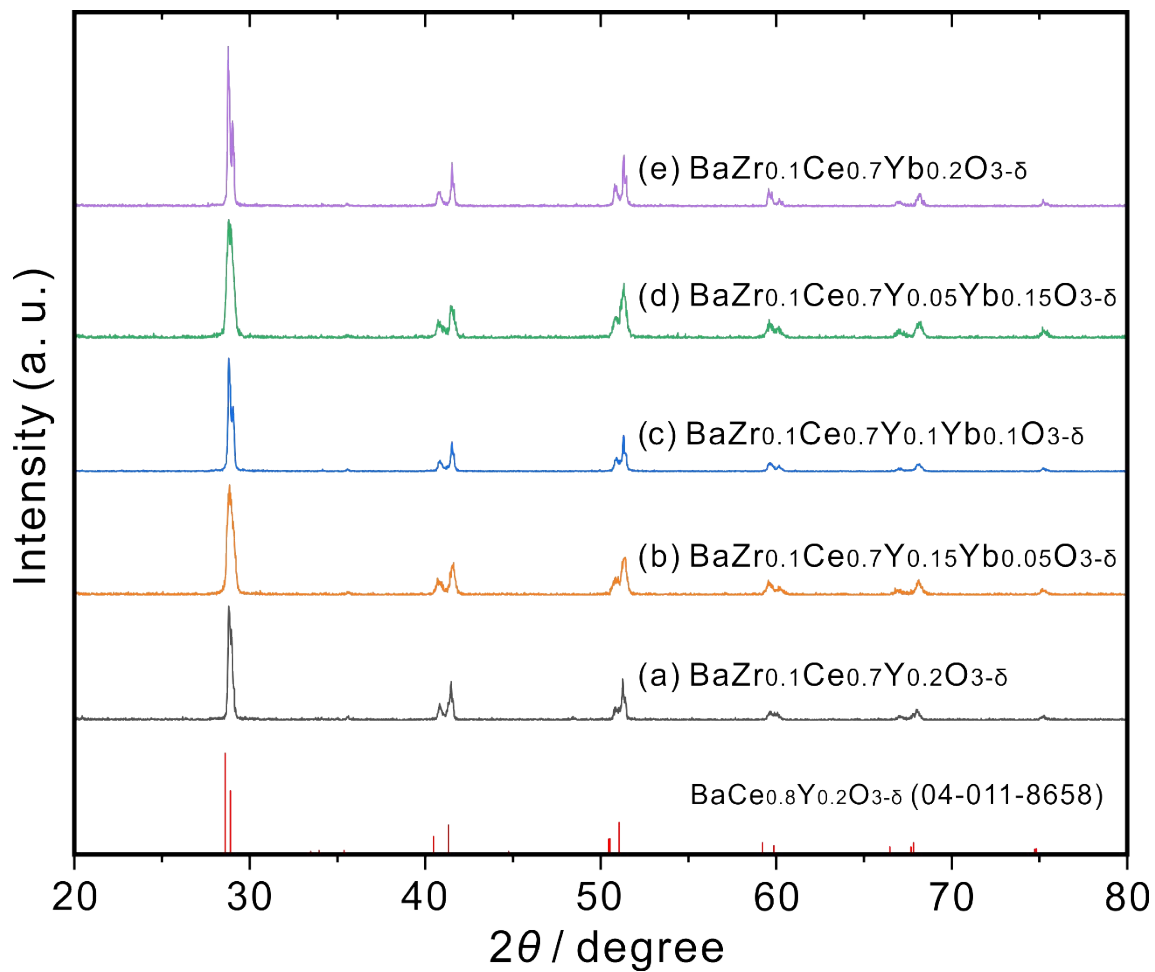

**Figure S2** Powder XRD patterns of (a)  $\text{BaZr}_{0.1}\text{Ce}_{0.7}\text{Y}_{0.2}\text{O}_{3-\delta}$ , (b)  $\text{BaZr}_{0.1}\text{Ce}_{0.7}\text{Y}_{0.15}\text{Yb}_{0.05}\text{O}_{3-\delta}$ , (c)  $\text{BaZr}_{0.1}\text{Ce}_{0.7}\text{Y}_{0.1}\text{Yb}_{0.1}\text{O}_{3-\delta}$ , (d)  $\text{BaZr}_{0.1}\text{Ce}_{0.7}\text{Y}_{0.05}\text{Yb}_{0.15}\text{O}_{3-\delta}$  and (e)  $\text{BaZr}_{0.1}\text{Ce}_{0.7}\text{Yb}_{0.2}\text{O}_{3-\delta}$  after sintering.

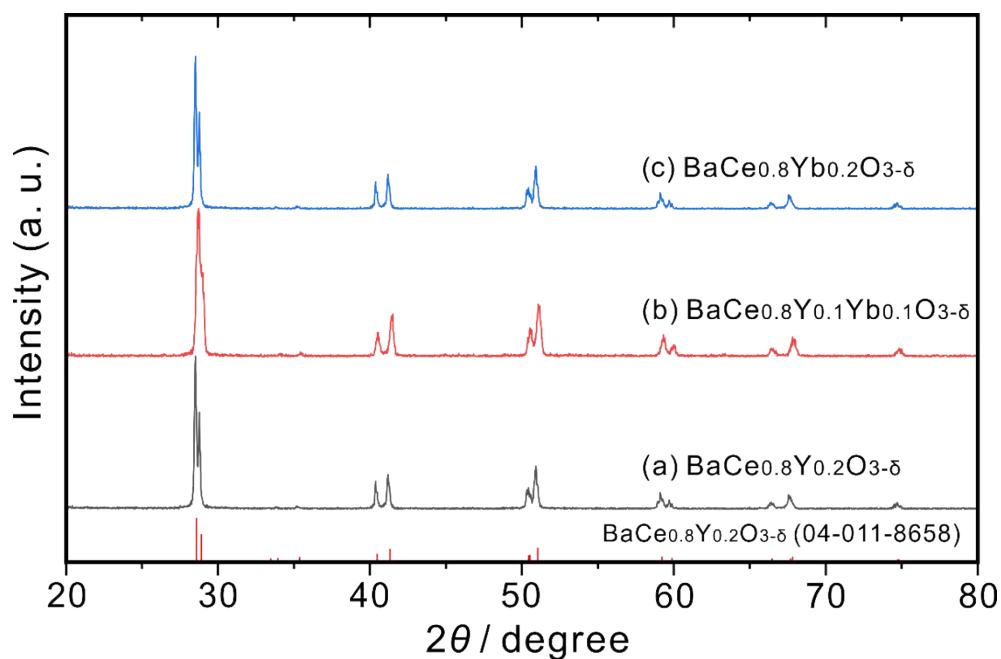

**Figure S3** Powder XRD patterns of (a)  $\text{BaCe}_{0.8}\text{Y}_{0.2}\text{O}_{3-\delta}$ , (b)  $\text{BaCe}_{0.8}\text{Y}_{0.1}\text{Yb}_{0.1}\text{O}_{3-\delta}$  and (c)  $\text{BaCe}_{0.8}\text{Yb}_{0.2}\text{O}_{3-\delta}$  after sintering.

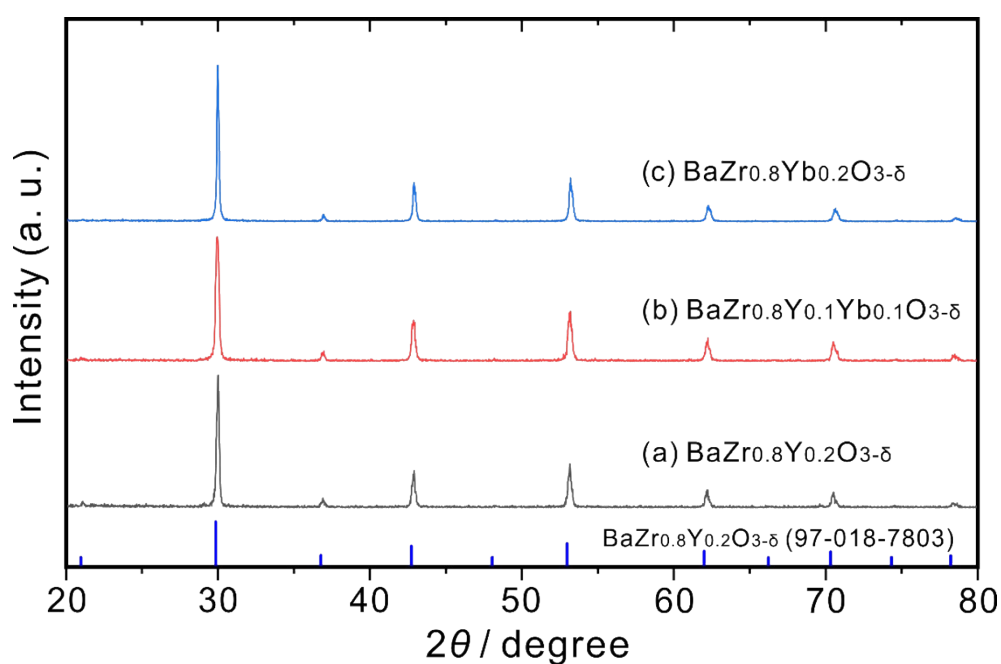

**Figure S4** Powder XRD patterns of (a)  $\text{BaZr}_{0.8}\text{Y}_{0.2}\text{O}_{3-\delta}$ , (b)  $\text{BaZr}_{0.8}\text{Y}_{0.1}\text{Yb}_{0.1}\text{O}_{3-\delta}$  and (c)  $\text{BaZr}_{0.8}\text{Yb}_{0.2}\text{O}_{3-\delta}$  after sintering.

## 2. SEM Images

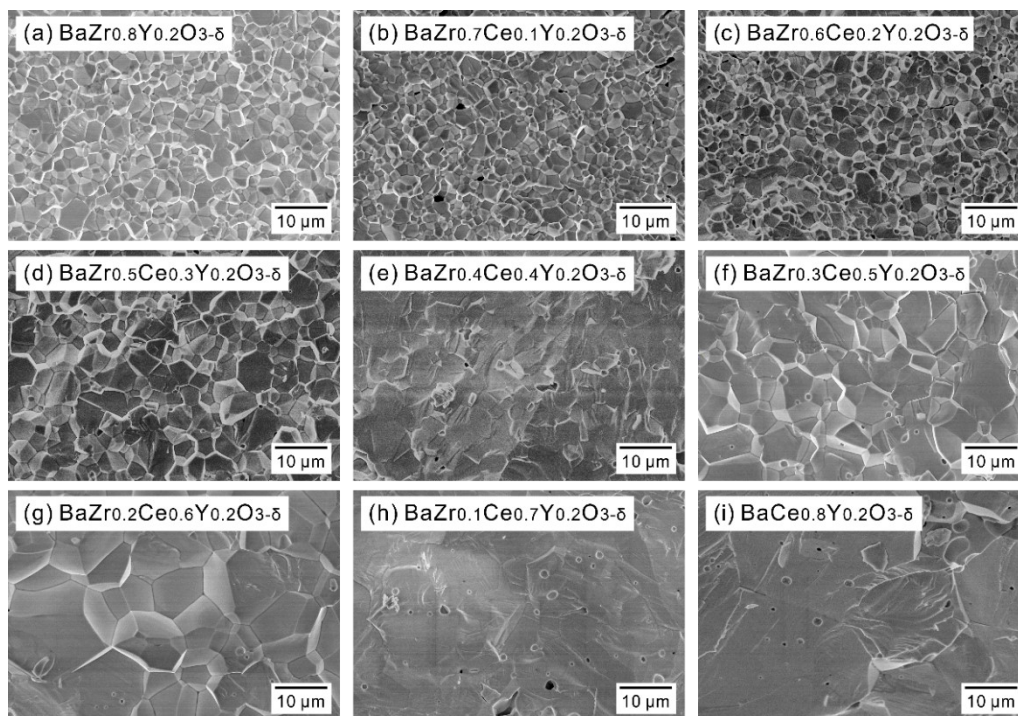

**Figure S5** SEM images of fractured cross-section of as-sintered (a)  $\text{BaZr}_{0.8}\text{Y}_{0.2}\text{O}_{3-\delta}$ , (b)  $\text{BaZr}_{0.7}\text{Ce}_{0.1}\text{Y}_{0.2}\text{O}_{3-\delta}$ , (c)  $\text{BaZr}_{0.6}\text{Ce}_{0.2}\text{Y}_{0.2}\text{O}_{3-\delta}$ , (d)  $\text{BaZr}_{0.5}\text{Ce}_{0.3}\text{Y}_{0.2}\text{O}_{3-\delta}$ , (e)  $\text{BaZr}_{0.4}\text{Ce}_{0.4}\text{Y}_{0.2}\text{O}_{3-\delta}$ , (f)  $\text{BaZr}_{0.3}\text{Ce}_{0.5}\text{Y}_{0.2}\text{O}_{3-\delta}$ , (g)  $\text{BaZr}_{0.2}\text{Ce}_{0.6}\text{Y}_{0.2}\text{O}_{3-\delta}$ , (h)  $\text{BaZr}_{0.1}\text{Ce}_{0.7}\text{Y}_{0.2}\text{O}_{3-\delta}$  and (i)  $\text{BaCe}_{0.8}\text{Y}_{0.2}\text{O}_{3-\delta}$ .

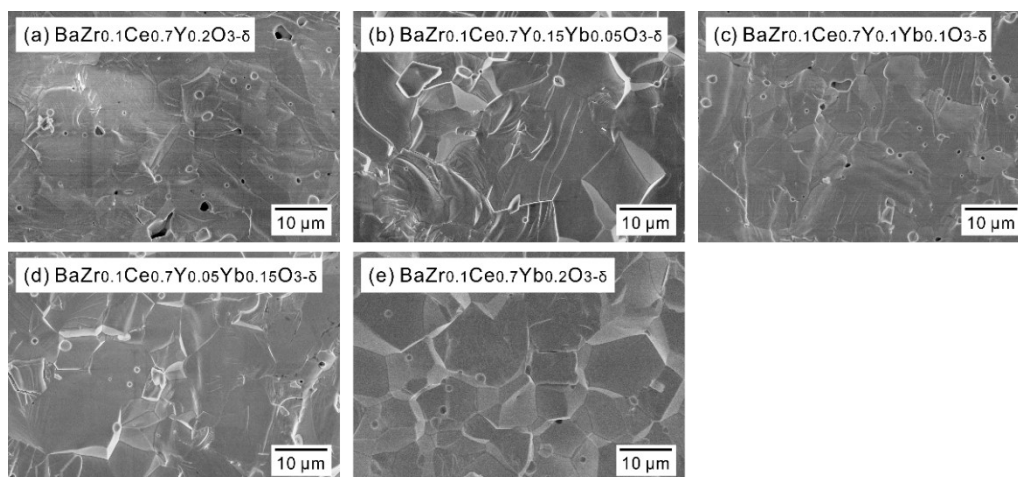

**Figure S6** SEM images of fractured cross-section of as-sintered (a)  $\text{BaZr}_{0.1}\text{Ce}_{0.7}\text{Y}_{0.2}\text{O}_{3-\delta}$ , (b)  $\text{BaZr}_{0.1}\text{Ce}_{0.7}\text{Y}_{0.15}\text{Yb}_{0.05}\text{O}_{3-\delta}$ , (c)  $\text{BaZr}_{0.1}\text{Ce}_{0.7}\text{Y}_{0.1}\text{Yb}_{0.1}\text{O}_{3-\delta}$ , (d)  $\text{BaZr}_{0.1}\text{Ce}_{0.7}\text{Y}_{0.05}\text{Yb}_{0.15}\text{O}_{3-\delta}$  and (e)  $\text{BaZr}_{0.1}\text{Ce}_{0.7}\text{Yb}_{0.2}\text{O}_{3-\delta}$ .

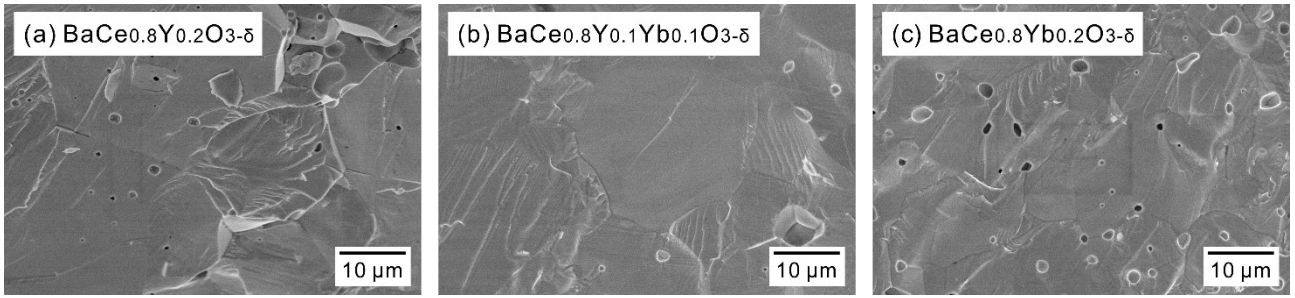

**Figure S7** SEM images of fractured cross-section of as-sintered (a)  $\text{BaCe}_{0.8}\text{Y}_{0.2}\text{O}_{3-\delta}$ , (b)  $\text{BaCe}_{0.8}\text{Y}_{0.1}\text{Yb}_{0.1}\text{O}_{3-\delta}$  and (c)  $\text{BaCe}_{0.8}\text{Yb}_{0.2}\text{O}_{3-\delta}$ .

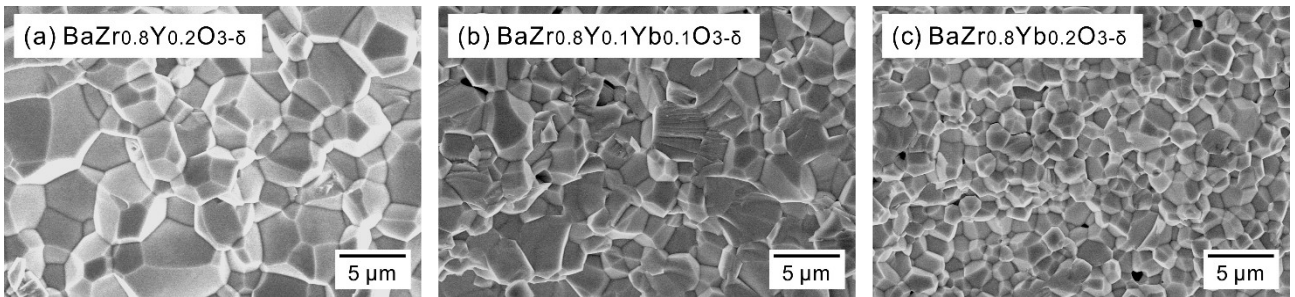

**Figure S8** SEM images of fractured cross-section of as-sintered (a)  $\text{BaZr}_{0.8}\text{Y}_{0.2}\text{O}_{3-\delta}$ , (b)  $\text{BaZr}_{0.8}\text{Y}_{0.1}\text{Yb}_{0.1}\text{O}_{3-\delta}$  and (c)  $\text{BaZr}_{0.8}\text{Yb}_{0.2}\text{O}_{3-\delta}$ .

### 3. EMF Measurements

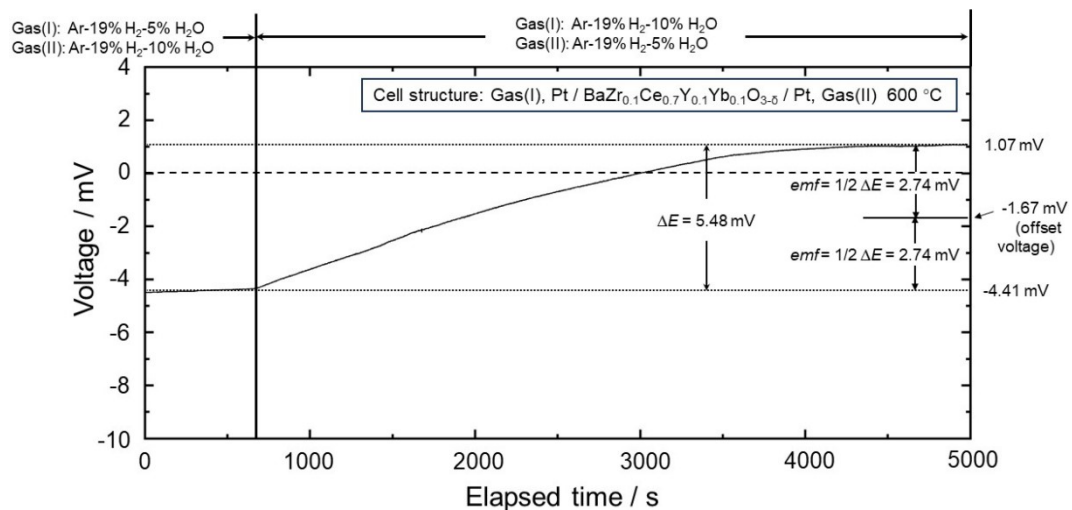

**Figure S9** Change of voltage of  $\text{BaZr}_{0.1}\text{Ce}_{0.7}\text{Y}_{0.1}\text{Yb}_{0.1}\text{O}_{3-\delta}$  with the elapsed time during switching the gas fed to the two electrodes at 600 °C.
